# Supplementary material for: Elastic Properties of Taurine Single Crystals Studied by Brillouin Spectroscopy
Source: MDPI journal article supplement (doi:10.3390/ijms22137116), 2021-07-01
Supplement: s1 [file s1]

## Supplementary Materials

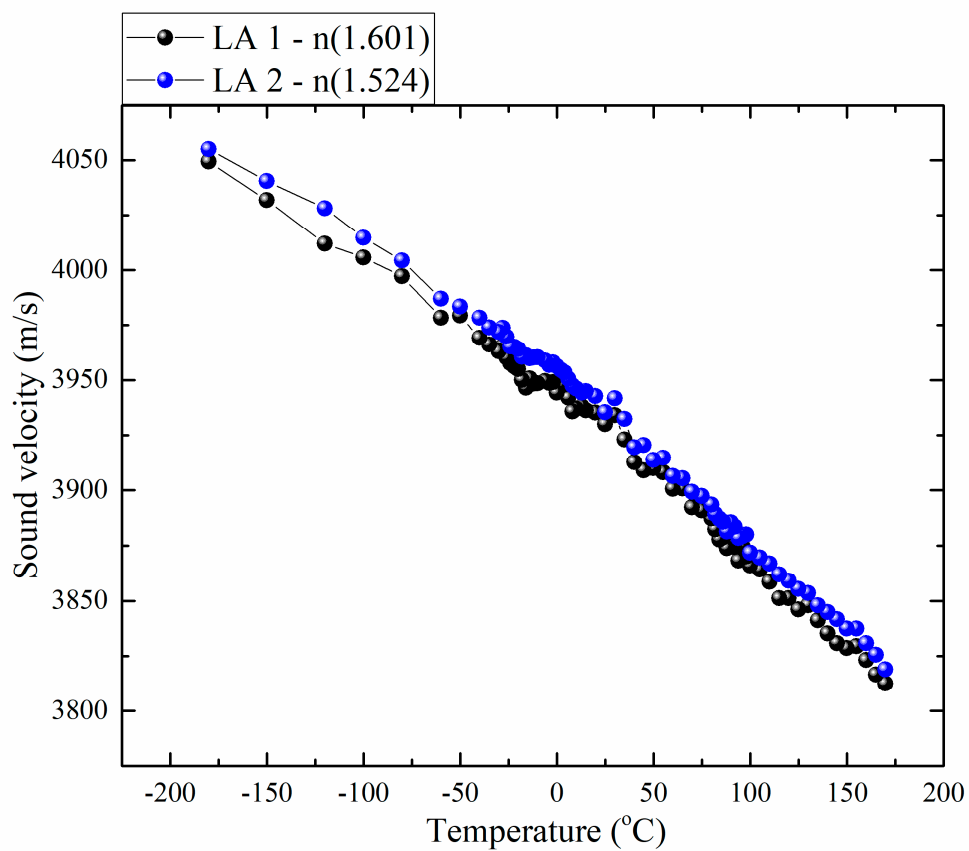

**Supplementary Figure S1.** Temperature dependence of the sound velocities of the LA1 and LA2 modes obtained by using the theoretically predicted refractive indices [22] and Eq.(4) as described in the text.
